# Supplementary material
Source: publisher figshare collection journal article supplement (https://acs.figshare.com/ndownloader/files/4066630)
Supplement: Supplementary file 1 [file 4066630]

## **Supporting Information**

# A Supra-monolayer Nanopattern for Organic Nanoparticle Array Deposition

*Sunxi Wang, Daniel J. Sobczynski, Pedram Jahanian, Juxhin Xhahysa, and Guangzhao Mao\**

Department of Chemical Engineering and Materials Science, Wayne State University,  
5050 Anthony Wayne Drive, Detroit, Michigan 48202, USA

\* Corresponding author (Tel. 313 577 3804. E-mail: [gzmao@eng.wayne.edu](mailto:gzmao@eng.wayne.edu))

## Table of Contents:

**Figure S1.** Electron microscopic images of polystyrene particles PS300 (a, FESEM) and PS900 (b, TEM) removed from the substrate after OTS CVD reaction. The bar length is 200 nm for (a) and 100 nm for (b). The arrows point to OTS film remnants attached to the polystyrene particles.

**Figure S2.** AFM images of *n*-docosane (a) and clarithromycin (b) on the PS900 substrate and 2-acetoxybenzoic acid on the PS900 (c) and PS300 (d) substrates at maximum nanoring filling. Z-range is 60 nm for (a–c) and 40 nm for (d).

**Figure S3.** AFM images of 2-acetoxybenzoic acid nanoparticles deposited on OTS nanopattern (PS900) from 1 (a), 0.3 (b), and 0.1 mM solution (c). Z-range = 60 nm.

**Scheme S1.** Side view of various proposed nanostructures of the nanorings used in the fractional surface coverage and contact angle calculations.

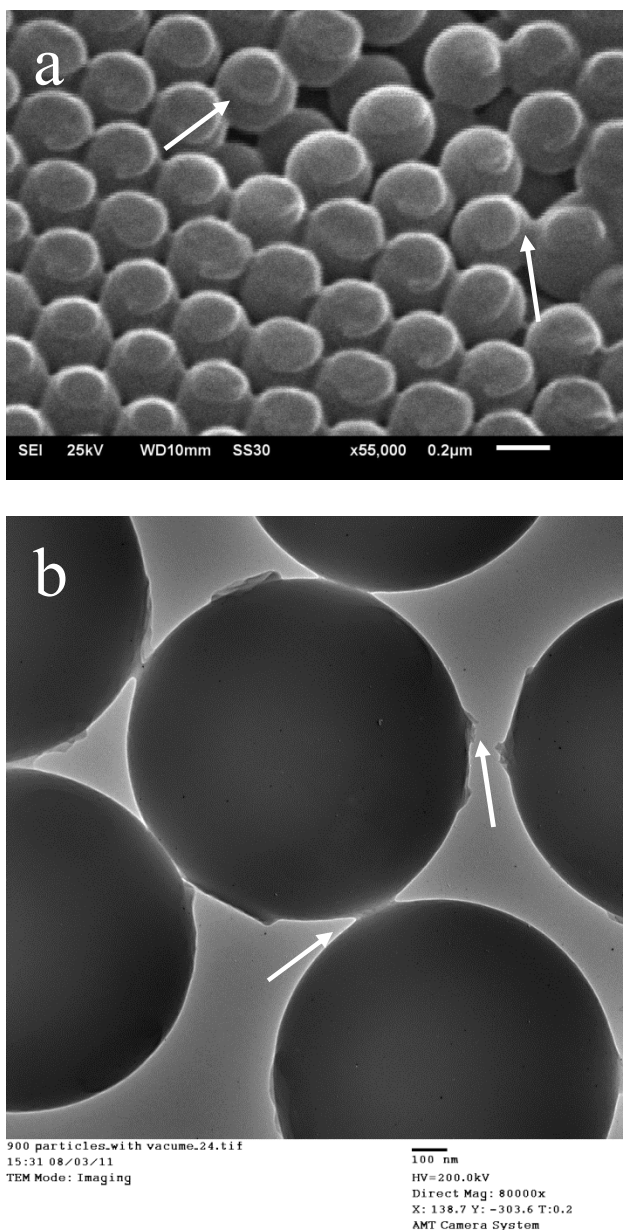

**Figure S1.** Electron microscopic images of polystyrene particles PS300 (a, FESEM) and PS900 (b, TEM) removed from the substrate after OTS CVD reaction. The bar length is 200 nm for (a) and 100 nm for (b). The arrows point to OTS film remnants attached to the polystyrene particles.

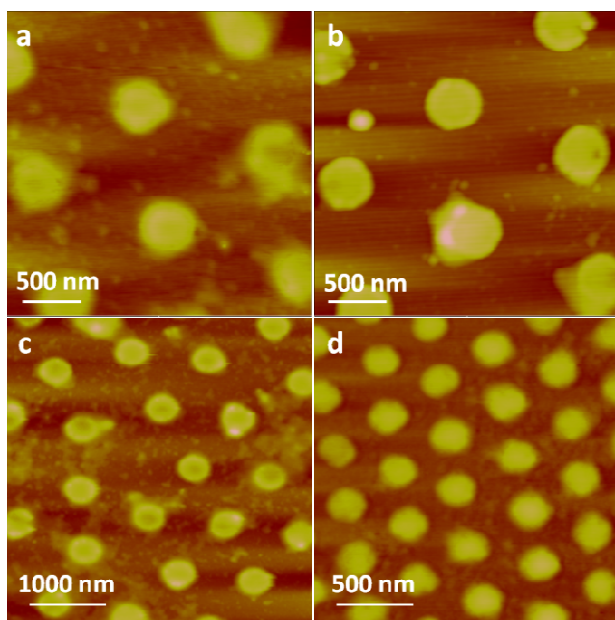

**Figure S2.** AFM images of *n*-docosane (a) and clarithromycin (b) on the PS900 substrate and 2-acetoxybenzoic acid on the PS900 (c) and PS300 (d) substrates at maximum nanoring filling. Z-range is 60 nm for (a–c) and 40 nm for (d).

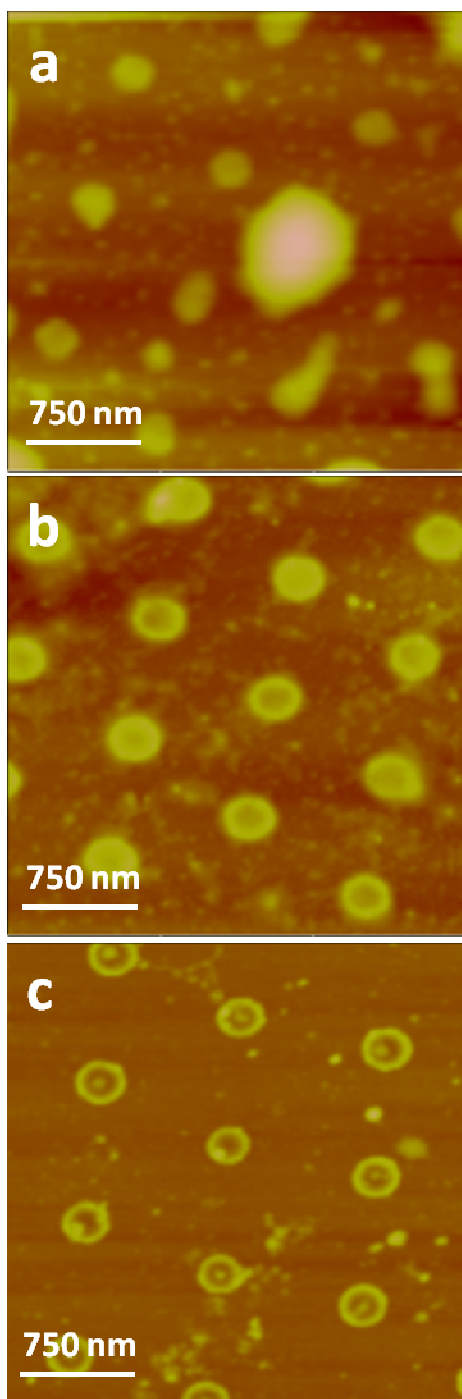

**Figure S3.** AFM images of 2-acetoxybenzoic acid nanoparticles deposited on OTS nanopattern (PS900) from 1 (a), 0.3 (b), and 0.1 mM solution (c). Z-range = 60 nm.

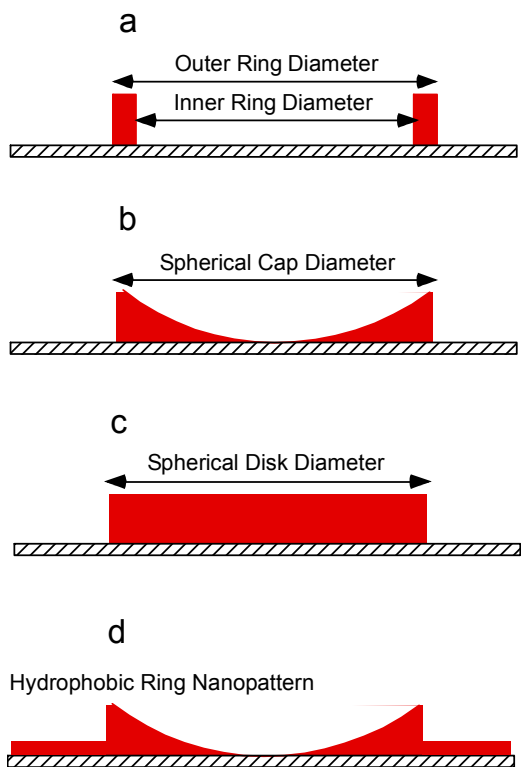

**Scheme S1.** Side view of various proposed nanostructures of the nanorings used in the fractional surface coverage and contact angle calculations.
